# Supplementary material for: Gene Essentiality Analyzed by In Vivo Transposon Mutagenesis and Machine Learning in a Stable Haploid Isolate of Candida albicans
Source: PubMed Central journal article supplement (PMC6212825; doi:10.1128/mbio.02048-18), 2018-10-30
Supplement: mbo005184136st1.pdf [file mbo005184136st1.pdf]

**Table S1.** Annotated features in *C. albicans*

|                                                 |
|-------------------------------------------------|
| blocked_reading_frame                           |
| blocked_reading_frame transposable element gene |
| centromere                                      |
| long_terminal_repeat                            |
| ncRNA Uncharacterized                           |
| ncRNA Verified                                  |
| ORF Alternatively spliced Uncharacterized       |
| ORF Alternatively spliced Verified              |
| ORF Dubious                                     |
| ORF Uncharacterized                             |
| ORF Uncharacterized transposable element gene   |
| ORF Verified                                    |
| ORF Verified transposable element gene          |
| pseudogene                                      |
| pseudogene Uncharacterized                      |
| repeat_region                                   |
| retrotransposon                                 |
| rRNA Verified                                   |
| snoRNA Uncharacterized                          |
| snRNA Uncharacterized                           |
| tRNA Uncharacterized                            |
| tRNA Verified                                   |
