# Supplementary material for: Gene Essentiality Analyzed by In Vivo Transposon Mutagenesis and Machine Learning in a Stable Haploid Isolate of Candida albicans
Source: PubMed Central journal article supplement (PMC6212825; doi:10.1128/mbio.02048-18), 2018-10-30
Supplement: mbo005184136st2.pdf [file mbo005184136st2.pdf]

Table S2. Number of insertions and reads in regions with low and high likelihood of nucleosome occupancy

Low and high nucleosome occupancy were derived from Tsankov et al. 2010.  
All log read values were normalized to the chromosome length

| Library | Chromosome                  | Hits in Low nucleosome occupancy region | Hits in high nucleosome occupancy region | Log Reads in Low nucleosome occupancy regions | Log reads in high nucleosome occupancy regions |
|---------|-----------------------------|-----------------------------------------|------------------------------------------|-----------------------------------------------|------------------------------------------------|
| 3       | Ca22chr1A_C_albicans_SC5314 | 0.100                                   | 0.068                                    | 0.056                                         | 0.040                                          |
| 3       | Ca22chr2A_C_albicans_SC5314 | 0.102                                   | 0.068                                    | 0.057                                         | 0.039                                          |
| 3       | Ca22chr3A_C_albicans_SC5314 | 0.231                                   | 0.183                                    | 0.141                                         | 0.116                                          |
| 3       | Ca22chr4A_C_albicans_SC5314 | 0.124                                   | 0.085                                    | 0.070                                         | 0.050                                          |
| 3       | Ca22chr5A_C_albicans_SC5314 | 0.132                                   | 0.096                                    | 0.075                                         | 0.057                                          |
| 3       | Ca22chr6A_C_albicans_SC5314 | 0.116                                   | 0.084                                    | 0.066                                         | 0.050                                          |
| 3       | Ca22chr7A_C_albicans_SC5314 | 0.159                                   | 0.119                                    | 0.093                                         | 0.071                                          |
| 3       | Ca22chrRA_C_albicans_SC5314 | 0.087                                   | 0.061                                    | 0.049                                         | 0.036                                          |
| 7       | Ca22chr1A_C_albicans_SC5314 | 0.067                                   | 0.045                                    | 0.032                                         | 0.022                                          |
| 7       | Ca22chr2A_C_albicans_SC5314 | 0.067                                   | 0.046                                    | 0.032                                         | 0.022                                          |
| 7       | Ca22chr3A_C_albicans_SC5314 | 0.160                                   | 0.127                                    | 0.083                                         | 0.066                                          |
| 7       | Ca22chr4A_C_albicans_SC5314 | 0.081                                   | 0.056                                    | 0.038                                         | 0.027                                          |
| 7       | Ca22chr5A_C_albicans_SC5314 | 0.088                                   | 0.063                                    | 0.043                                         | 0.031                                          |
| 7       | Ca22chr6A_C_albicans_SC5314 | 0.077                                   | 0.057                                    | 0.037                                         | 0.028                                          |
| 7       | Ca22chr7A_C_albicans_SC5314 | 0.105                                   | 0.078                                    | 0.052                                         | 0.037                                          |
| 7       | Ca22chrRA_C_albicans_SC5314 | 0.058                                   | 0.040                                    | 0.027                                         | 0.019                                          |
| 11      | Ca22chr1A_C_albicans_SC5314 | 0.070                                   | 0.046                                    | 0.038                                         | 0.026                                          |
| 11      | Ca22chr2A_C_albicans_SC5314 | 0.070                                   | 0.047                                    | 0.038                                         | 0.027                                          |
| 11      | Ca22chr3A_C_albicans_SC5314 | 0.173                                   | 0.135                                    | 0.101                                         | 0.082                                          |
| 11      | Ca22chr4A_C_albicans_SC5314 | 0.087                                   | 0.059                                    | 0.047                                         | 0.034                                          |
| 11      | Ca22chr5A_C_albicans_SC5314 | 0.093                                   | 0.066                                    | 0.051                                         | 0.038                                          |
| 11      | Ca22chr6A_C_albicans_SC5314 | 0.081                                   | 0.059                                    | 0.045                                         | 0.034                                          |
| 11      | Ca22chr7A_C_albicans_SC5314 | 0.116                                   | 0.083                                    | 0.065                                         | 0.047                                          |
| 11      | Ca22chrRA_C_albicans_SC5314 | 0.059                                   | 0.041                                    | 0.032                                         | 0.023                                          |
