# Supplementary material for: Gene Essentiality Analyzed by In Vivo Transposon Mutagenesis and Machine Learning in a Stable Haploid Isolate of Candida albicans
Source: PubMed Central journal article supplement (PMC6212825; doi:10.1128/mbio.02048-18), 2018-10-30
Supplement: mbo005184136st3.pdf [file mbo005184136st3.pdf]

**Table S3.** Riboflavin biosynthesis pathway analysis

(1) O'Meara et al. 2015 Nature Comm.

| Ca standard name | Common name | Ca Tn-Ess | Tet Repression study (1) | ESC-Ess | Sc $\Delta$ -Ess | ScTn-Ess | Sp $\Delta$ -Ess | SpTn-Ess |
|------------------|-------------|-----------|--------------------------|---------|------------------|----------|------------------|----------|
| CR_02990C_A      | RIB1        | Ess       | Ess                      | Ess     | NE               | Ess      | Ess              | Ess      |
| C1_12360C_A      | RIB3        | Ess       | NE                       | NE      | Ess              | Ess      | Ess              | Ess      |
| C1_05560W_A      | RIB4        | Ess       | NE                       | NE-repr | NE               | Ess      | Ess              | Ess      |
| C5_05300W_A      | RIB5        | NE        | NE                       | NE      | Ess              | Ess      | Ess              | Ess      |
| C1_12810W_A      | RIB7        | Ess       | NE                       | NE      | Ess              | Ess      | Ess              | NE       |
| CR_03740C_A      | FMN1        | Ess       | NE                       | NE      | Ess              | Ess      | Ess              | Ess      |
| C1_08650C_A      | FAD1        | Ess       | no data                  | Ess     | Ess              | Ess      | NE               | Ess      |
