# Supplementary material for: Gene Essentiality Analyzed by In Vivo Transposon Mutagenesis and Machine Learning in a Stable Haploid Isolate of Candida albicans
Source: PubMed Central journal article supplement (PMC6212825; doi:10.1128/mbio.02048-18), 2018-10-30
Supplement: mbo005184136st4.pdf [file mbo005184136st4.pdf]

**Table S4A.** Yeast strains

| Strain number      | Ploidy  | Description                                                                                      | Source                |
|--------------------|---------|--------------------------------------------------------------------------------------------------|-----------------------|
| YJB-T 1 (SC5314)   | Diploid | <i>C. albicans</i> type strain<br>(Gillum et al. 1984)                                           | Lab stocks            |
| YJB-T 900 (GZY896) | Haploid | <i>MTL a ura3Δ::imm434 his4<br/>gal1Δ::ura3Δ::HIS4</i>                                           | (Mielich et al. 2018) |
| YJB-T 1792         | Haploid | <i>MTL a ura3Δ::imm434 his4<br/>gal1Δ::ura3Δ::HIS4<br/>NEUT5L region ::Ac URA3</i>               | This study            |
| YJB-T 1795         | Haploid | <i>MTL a ura3Δ::imm434 his4<br/>gal1Δ::ura3Δ::HIS4<br/>ade2::Ds NAT1</i>                         | This study            |
| YJB-T 1081         | Haploid | <i>MTL a ura3Δ::imm434 his4<br/>gal1Δ::ura3Δ::HIS4 ade2::Ds NAT1<br/>NEUT5L region ::Ac URA3</i> | This study            |
| YJB-T 1082         | Haploid | <i>MTL a ura3Δ::imm434 his4<br/>gal1Δ::ura3Δ::HIS4 ade2::Ds NAT1<br/>NEUT5L region ::Ac URA3</i> | This study            |
| YJB-T 257 (GZY803) | Haploid | <i>MTL a his4 ura3Δ::HIS4</i>                                                                    | (Hickman et al. 2013) |
| YJB-T 2743         | Haploid | <i>MTL a his4 ura3Δ::HIS4 ade2::Ds NAT1<br/>NEUT5L region ::Ac URA3</i>                          | This study            |
| YJB 12801          | Haploid | Haploid I <i>MTL a, his4, galΔ, ade2</i>                                                         | (Hickman et al. 2013) |
| YJB 12881          | Haploid | Haploid XI <i>MTL a, his4, galΔ</i>                                                              | (Hickman et al. 2013) |

**Table S4B. Plasmids**

| Plasmid name     | Description                        | Source                |
|------------------|------------------------------------|-----------------------|
| BJB-T 133 pRK402 | Ds plasmid with <i>NAT1</i> marker | This study            |
| BJB-T 135 pKM300 | Ac plasmid with <i>URA3</i> marker | (Mielich et al. 2018) |

**Table S4C. Primers**

| Primer No. | Sequence                                                                        | Purpose                                                   |
|------------|---------------------------------------------------------------------------------|-----------------------------------------------------------|
| BP117      | GTTTTGGAGTATTGTGATGGTAT                                                         | Check Ds integration/excision                             |
| BP118      | TTTCGTTGTTGTTTCTTATTCTGGT                                                       | Check Ds integration                                      |
| BP119      | TCATCATCTGGGAAAACCTTAGTC                                                        | Check Ds integration                                      |
| BP120      | CCAAACTTTTCCCAATGTGTAAC                                                         | Check Ds integration/excision                             |
| BP104      | GGTGATGGATTAGGACAACA                                                            | Check Ac integration                                      |
| BP161      | AAAAGGCCTGATAAGGAGAGATCCATTAAGAGCA                                              | Check Ac integration                                      |
| BP664      | AATGATACGGCGACCACCGAGATCTACACTCTTCCCTAC<br>ACGACGCTCTCCGATCTNNNNNGTATTTACCGACCG | F_Tn specific primer with P5 and RD1<br>Illumina sequence |
| BP724      | Phos/GATCGGAAGAGCACACGTCTGAACTCCAGTCA                                           | Adapter sequence for Illumina                             |
| BP725      | ACGCTCTCCGATC*T                                                                 | Adapter sequence for Illumina                             |
| BP847      | CAAGCAGAAGACGGCATAACGAGATCGTGATGTGACTGG<br>AGTTCAGACGTGTGCTCTTCCGATCT           | R_Tnseq_index1 with P7 and RD2<br>Illumina sequence       |

|       |                                                                                |                                                      |
|-------|--------------------------------------------------------------------------------|------------------------------------------------------|
| BP770 | CAAGCAGAAGACGGCATAACGAGAT <u>ACATCGGTGACTGG</u><br>AGTTCAGACGTGTGCTCTTCCGATCT  | R_Tnseq_index2 with P7 and RD2<br>Illumina sequence  |
| BP848 | CAAGCAGAAGACGGCATAACGAGAT <u>GCCTAAGTGACTGG</u><br>AGTTCAGACGTGTGCTCTTCCGATCT  | R_Tnseq_index3 with P7 and RD2<br>Illumina sequence  |
| BP771 | CAAGCAGAAGACGGCATAACGAGAT <u>TGGTCAGTGACTGG</u><br>AGTTCAGACGTGTGCTCTTCCGATCT  | R_Tnseq_index4 with P7 and RD2<br>Illumina sequence  |
| BP665 | CAAGCAGAAGACGGCATAACGAGAT <u>ACTGTGTGACTGG</u><br>AGTTCAGACGTGTGCTCTTCCGATCT   | R_Tnseq_index5 with P7 and RD2<br>Illumina sequence  |
| BP666 | CAAGCAGAAGACGGCATAACGAGAT <u>ATTGGCGTGACTGG</u><br>AGTTCAGACGTGTGCTCTTCCGATCT  | R_Tnseq_index6 with P7 and RD2<br>Illumina sequence  |
| BP772 | CAAGCAGAAGACGGCATAACGAGAT <u>GATCTGGTGACTGG</u><br>AGTTCAGACGTGTGCTCTTCCGATCT  | R_Tnseq_index7 with P7 and RD2<br>Illumina sequence  |
| BP849 | CAAGCAGAAGACGGCATAACGAGAT <u>CAAGTGTGACTGG</u><br>AGTTCAGACGTGTGCTCTTCCGATCT   | R_Tnseq_index8 with P7 and RD2<br>Illumina sequence  |
| BP850 | CAAGCAGAAGACGGCATAACGAGAT <u>CAAGTGTGACTGG</u><br>AGTTCAGACGTGTGCTCTTCCGATCT   | R_Tnseq_index9 with P7 and RD2<br>Illumina sequence  |
| BP851 | CAAGCAGAAGACGGCATAACGAGAT <u>AAGCTAGTGACTGG</u><br>AGTTCAGACGTGTGCTCTTCCGATCT  | R_Tnseq_index10 with P7 and RD2<br>Illumina sequence |
| BP852 | CAAGCAGAAGACGGCATAACGAGAT <u>GTAGCCGTGACTGG</u><br>AGTTCAGACGTGTGCTCTTCCGATCT  | R_Tnseq_index11 with P7 and RD2<br>Illumina sequence |
| BP773 | CAAGCAGAAGACGGCATAACGAGAT <u>TACAAGGTGACTGG</u><br>AGTTCAGACGTGTGCTCTTCCGATCT  | R_Tnseq_index12 with P7 and RD2<br>Illumina sequence |
| BP853 | CAAGCAGAAGACGGCATAACGAGAT <u>TTGACTGTGACTGG</u><br>AGTTCAGACGTGTGCTCTTCCGATCT  | R_Tnseq_index13 with P7 and RD2<br>Illumina sequence |
| BP854 | CAAGCAGAAGACGGCATAACGAGAT <u>GGAAGTGTGACTGG</u><br>AGTTCAGACGTGTGCTCTTCCGATCT  | R_Tnseq_index14 with P7 and RD2<br>Illumina sequence |
| BP855 | CAAGCAGAAGACGGCATAACGAGAT <u>TGACATGTGACTGG</u><br>AGTTCAGACGTGTGCTCTTCCGATCT  | R_Tnseq_index15 with P7 and RD2<br>Illumina sequence |
| BP856 | CAAGCAGAAGACGGCATAACGAGAT <u>GGACGGTGACTGG</u><br>AGTTCAGACGTGTGCTCTTCCGATCT   | R_Tnseq_index16 with P7 and RD2<br>Illumina sequence |
| BP857 | CAAGCAGAAGACGGCATAACGAGAT <u>GCGGACGTGACTGG</u><br>AGTTCAGACGTGTGCTCTTCCGATCT  | R_Tnseq_index18 with P7 and RD2<br>Illumina sequence |
| BP858 | CAAGCAGAAGACGGCATAACGAGAT <u>TTTCACGTGACTGGA</u><br>GTTTCAGACGTGTGCTCTTCCGATCT | R_Tnseq_index19 with P7 and RD2<br>Illumina sequence |
| RD250 | CAAGCAGAAGACGGCATAACGAGAT <u>GGCCACGTGACTGG</u>                                | R_Tnseq_index20 with P7 and RD2                      |

|       |                                                  |                                 |
|-------|--------------------------------------------------|---------------------------------|
| BP859 | AGTTCAGACGTGTGCTCTTCCGATCT                       | Illumina sequence               |
| BP860 | CAAGCAGAAGACGGCATACGAGAT <u>CGAAAC</u> GTGACTGG  | R_Tnseq_index21 with P7 and RD2 |
|       | AGTTCAGACGTGTGCTCTTCCGATCT                       | Illumina sequence               |
| BP861 | CAAGCAGAAGACGGCATACGAGAT <u>CGTACG</u> GTGACTGG  | R_Tnseq_index22 with P7 and RD2 |
|       | AGTTCAGACGTGTGCTCTTCCGATCT                       | Illumina sequence               |
| BP862 | CAAGCAGAAGACGGCATACGAGAT <u>CCACTC</u> GTGACTGGA | R_Tnseq_index23 with P7 and RD2 |
|       | GTTTCAGACGTGTGCTCTTCCGATCT                       | Illumina sequence               |
| BP863 | CAAGCAGAAGACGGCATACGAGATAT <u>CAGT</u> GTGACTGG  | R_Tnseq_index25 with P7 and RD2 |
|       | AGTTCAGACGTGTGCTCTTCCGATCT                       | Illumina sequence               |
| BP864 | CAAGCAGAAGACGGCATACGAGAT <u>AGGAAT</u> GTGACTGG  | R_Tnseq_index27 with P7 and RD2 |
|       | AGTTCAGACGTGTGCTCTTCCGATCT                       | Illumina sequence               |

---

---
